# Supplementary material
Source: publisher figshare collection journal article supplement (https://diabetesjournals.figshare.com/ndownloader/files/24173846)
Supplement: Supplementary file 1 [file 24173846]

**Relationship between diabetic retinopathy stages and risk of major lower-extremity  
arterial disease in patients with type 2 diabetes**

Ninon Foussard, Pierre-Jean Saulnier, Louis Potier, Stéphanie Ragot, Fabrice Schneider, Elise  
Gand, Marie Monlun, Laurence Baillet-Blanco, Gilberto Velho, Michel Marre, Ronan  
Roussel, Vincent Rigalleau, Kamel Mohammedi, Samy Hadjadj  
On behalf of the SURDIAGENE Study Group

**Supplementary material**

**Supplemental Table 1.** Characteristics of participants according to diabetic retinopathy stages  
at baseline

**Supplemental Table 2.** Primary outcome by diabetic retinopathy stages (using an alternative  
definition) at baseline

**Supplemental Table 3.** Risks for minor and major lower-limb amputations by diabetic  
retinopathy stages at baseline

**Supplemental Table 1. Characteristics of participants according to diabetic retinopathy stages at baseline**

|                                      | Diabetic retinopathy |                            |                            |         |
|--------------------------------------|----------------------|----------------------------|----------------------------|---------|
|                                      | Absent               | Non-proliferative          | Proliferative              | P       |
| N                                    | 762 (58)             | 475 (36)                   | 83 (6)                     |         |
| <b>Clinical parameters</b>           |                      |                            |                            |         |
| Female                               | 334 (44)             | 210 (44)                   | 36(43)                     | 0.98    |
| Age (years)                          | 64±11                | 66±10 <sup>a</sup>         | 64±9                       | 0.02    |
| Duration of diabetes (years)         | 11±9                 | 18±10 <sup>a</sup>         | 18±11 <sup>a</sup>         | <0.0001 |
| Body mass index (kg/m <sup>2</sup> ) | 32±6                 | 31±6 <sup>a</sup>          | 32±6                       | 0.08    |
| Heart rate (beats per minute)        | 70±14                | 71±14                      | 74±14                      | 0.06    |
| Systolic blood pressure (mmHg)       | 130±16               | 134±19 <sup>a</sup>        | 138±19 <sup>a</sup>        | <0.0001 |
| Diastolic blood pressure (mmHg)      | 72±11                | 72±12                      | 76±11 <sup>a,b</sup>       | 0.02    |
| <b>Biological parameters</b>         |                      |                            |                            |         |
| HbA1c (%)                            | 7.6±1.5              | 8.1±1.5 <sup>a</sup>       | 8.2±1.8 <sup>a</sup>       | <0.0001 |
| HbA1c (mmol/mol)                     | 59±17                | 65±16 <sup>a</sup>         | 66±20 <sup>a</sup>         |         |
| Urinary ACR (mg/mmol)                | 2 (1, 7)             | 5 (1, 21) <sup>a</sup>     | 27 (3, 117) <sup>a,b</sup> | <0.0001 |
| eGFR (ml/min/1.73m <sup>2</sup> )    | 77±22                | 70±26 <sup>a</sup>         | 65±28 <sup>a,b</sup>       | <0.0001 |
| Total cholesterol (mg/dl)            | 184±43               | 187±48                     | 190±44                     | 0.35    |
| HDL cholesterol (mg/dl)              | 47±16                | 46±15                      | 51±16                      | 0.09    |
| LDL cholesterol (mg/dl)              | 103±34               | 109±42 <sup>a</sup>        | 112±40 <sup>a</sup>        | 0.01    |
| Triglycerides (mg/dl)                | 142 (101, 208)       | 134 (93, 200) <sup>a</sup> | 121 (101, 185)             | 0.04    |
| <b>Medical history</b>               |                      |                            |                            |         |
| Diabetic macular oedema              | 0                    | 93 (20)                    | 42 (51)                    | <0.0001 |
| Diabetic kidney disease              | 201 (26)             | 194 (41)                   | 54 (65)                    | <0.0001 |

|                                     |            |            |            |         |
|-------------------------------------|------------|------------|------------|---------|
| Tabaco smoking                      |            |            |            |         |
| Never                               | 391 (51)   | 267 (56)   | 45 (54)    | 0.40    |
| Former                              | 282 (37)   | 165 (35)   | 31 (37)    |         |
| Current                             | 89 (12)    | 43 (9)     | 7 (8)      |         |
| Number of cigarette packs per year  | 25 (10,40) | 24 (10,40) | 25 (10,37) | 0.78    |
| Macrovascular disease               | 244 (32)   | 174 (37)   | 33 (40)    | 0.13    |
| <b>History of treatment use</b>     |            |            |            |         |
| Antihypertensive drugs              | 613 (80)   | 397 (84)   | 68 (82)    | 0.38    |
| Statin                              | 340 (45)   | 205 (43)   | 40 (48)    | 0.67    |
| Fibrate                             | 102 (13)   | 52 (11)    | 3 (4)      | 0.02    |
| Antiplatelet or anticoagulant drugs | 289 (38)   | 200 (42)   | 37 (45)    | 0.23    |
| Metformin                           | 407 (53)   | 212 (45)   | 28 (34)    | 0.0002  |
| Insulin therapy                     | 369 (48)   | 358 (75)   | 59 (71)    | <0.0001 |

Data presented as numbers (%), mean $\pm$ SD, or median (25<sup>th</sup>, 75<sup>th</sup> percentiles) for variables with skewed distribution (urinary albumin-to-creatinine ratio (ACR), triglycerides and number of cigarette packs per year). Comparisons of qualitative and quantitative parameters were performed using Chi-square and ANOVA tests, respectively. Tukey Kramer HSD test was performed following ANOVA to detect significant difference between subjects with absent (a) or non-proliferative retinopathy (b). Kruskal–Wallis test was used for comparisons of variables with skewed distribution. Analyses performed in participants without a baseline history of lower-extremity arterial disease. P<0.05 was considered as significant.

**Supplemental Table 2. Primary outcome by diabetic retinopathy stages at baseline using an alternative definition\***

|                                                        |               | <b>Major LEAD</b> |                       |                                                                     |                    |          |
|--------------------------------------------------------|---------------|-------------------|-----------------------|---------------------------------------------------------------------|--------------------|----------|
|                                                        |               | <b>No, n</b>      | <b>Yes, n<br/>(%)</b> | <b>Incidence rate<br/>(95% CI)<br/>( per 1000<br/>person-years)</b> | <b>HR (95% CI)</b> | <b>P</b> |
| <b>Diabetic<br/>retinopathy<br/>stages at baseline</b> | <b>Absent</b> | 731               | 31 (4.1)              | 5.5 (3.9 – 7.8)                                                     | Reference          |          |
|                                                        | <b>Simple</b> | 343               | 38 (10.0)             | 13.5 (9.8 – 18.6)                                                   | 2.28 (1.37 – 3.82) | 0.001    |
|                                                        | <b>Severe</b> | 152               | 25 (14.1)             | 19.7 (13.2 – 29.4)                                                  | 2.74 (1.49 – 4.99) | 0.001    |

Hazard ratios (HR), with 95% confidence interval (CI), estimated using Cox proportional hazards regression model, for major lower-extremity arterial disease by retinopathy stages\*: absent (reference), simple (mild or moderate non proliferative) and severe (severe non-proliferative or proliferative). Analyses adjusted for age, sex, duration of diabetes, BMI, systolic blood pressure, estimated glomerular filtration rate, urinary albumin-to-creatinine ratio, plasma concentrations of HDL and LDL-cholesterol, history of tobacco smoking (never, former, current), history of macrovascular disease, and use of antihypertensive, statin, metformin, and insulin therapies. Analyses performed in participants without a baseline history of lower-extremity arterial disease. P<0.05 was significant.

**Supplemental Table 3. Risks for minor and major lower-limb amputations by diabetic retinopathy stages at baseline**

|                                                            |                                                    | <b>Minor amputation<br/>during follow-up</b> |                       |                         |          | <b>Major amputation<br/>during follow-up</b> |                       |                        |          |
|------------------------------------------------------------|----------------------------------------------------|----------------------------------------------|-----------------------|-------------------------|----------|----------------------------------------------|-----------------------|------------------------|----------|
|                                                            |                                                    | <b>No, n</b>                                 | <b>Yes, n<br/>(%)</b> | <b>HR (95% CI)</b>      | <b>P</b> | <b>No, n</b>                                 | <b>Yes, n<br/>(%)</b> | <b>HR (95% CI)</b>     | <b>P</b> |
| <b>Diabetic<br/>retinopathy<br/>stages at<br/>baseline</b> | <b>Absent</b>                                      | 782                                          | 5 (0.6)               | Reference               |          | 782                                          | 6 (0.8)               | Reference              |          |
|                                                            | <b>Non-<br/>proliferative</b>                      | 465                                          | 13 (2.7)              | 3.63<br>(1.25 – 12.09)  | 0.02     | 465                                          | 19 (3.9)              | 5.61<br>(2.09 – 17.85) | 0.0004   |
|                                                            | <b>Proliferative</b>                               | 76                                           | 5 (6.2)               | 13.57<br>(3.31 – 56.13) | 0.0005   | 76                                           | 4 (5.0)               | 6.73<br>(1.28 – 30.19) | 0.03     |
|                                                            | <b>Non-<br/>proliferative or<br/>proliferative</b> | 541                                          | 18 (3.2)              | 4.48<br>(1.63 – 14.48)  | 0.003    | 541                                          | 23 (4.1)              | 5.72<br>(2.16 – 18.06) | 0.0003   |

Hazard ratios (HR), with 95% confidence interval (CI), estimated using Cox proportional hazards regression models, for minor and major lower-limb amputations in participants with non-proliferative, proliferative or any retinopathy versus those with no history of retinopathy at baseline (reference). Analyses adjusted for age, sex, duration of diabetes, BMI, systolic blood pressure, estimated glomerular filtration rate, urinary albumin-to-creatinine ratio, HDL and LDL-cholesterol, history of tobacco smoking (never, former, current), history of macrovascular disease,

---

and use of antihypertensive, statin, metformin and insulin therapies. Analyses performed in participants without a history of lower-limb amputation at baseline.  $P < 0.05$  was significant.
